# Supplementary material for: Signal mining and risk analysis of the over-indications use of bevacizumab
Source: Research Square preprint supplement (doi:10.21203/rs.3.rs-6220237/v1), 2025-07-14
Supplement: Supplementary file 1 [file 17781e769c4400bb6701bf90.docx]

Supplementary Material

Signal mining and risk analysis of the over-indications use of bevacizumab

**Jing Wang1, Yuejing Wang1, Dan Chen1, Ying Ke1, Jiexia Tu1, Xuesong Ren, Jia Chen2*, Li Chen3,4***

*** Correspondence:** Jia Chen, E-mail: 751433605@qq.com; Li Chen, [E-mail: chenl_hxey@scu.edu.cn](mailto:asmith@example.com)

## Supplementary Tables

**Supplementary Table S1.** Fourfold table of disproportional method

|  | Adverse event of interest | All other adverse events | Total |
| --- | --- | --- | --- |
| Drug of interest | a | b | a+b |
| All other drugs in FAERS | c | d | c+d |
| Total | a+c | b+d | N= a+b+c+d |

**Supplementary Table S2.** Formulas and thresholds of the ROR method and the MHRA method

| Method | Formula | Threshold value |
| --- | --- | --- |
| ROR | ROR=ad/bc  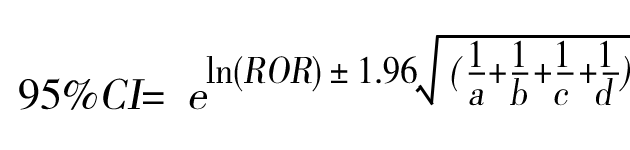SE（lnROR）= | a signal is detected, if a≥3,and the lower limit of the 95%(ROR)＞1 |
| MHRA | PRR=  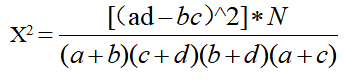 | a signal is detected, if a≥3,and PRR≥2,and X2≥4 |

**Supplementary Table S3.** Reported number and constituent ratio of ADEs in different SOCs

| SOC | Over-indications use | Approved indications use |
| --- | --- | --- |
| Vascular disorders | 2012（5.27%） | 1557（14.78%） |
| Surgical and medical procedures | 61（0.16%） | 27（0.26%） |
| Social circumstances | 29（0.08%） | 0（0.00%） |
| Skin and subcutaneous tissue disorders | 1196（3.13%） | 25（0.24%） |
| Respiratory, thoracic and mediastinal disorders | 2007（5.26%） | 408（3.87%） |
| Reproductive system and breast disorders | 174（0.46%） | 144（1.37%） |
| Renal and urinary disorders | 1537（4.02%） | 791（7.51%） |
| Psychiatric disorders | 439（1.15%） | 0（0.00%） |
| Product issues | 30（0.08%） | 22（0.21%） |
| Nervous system disorders | 2102（5.50%） | 374（3.55%） |
| Neoplasms benign, malignant and unspecified (incl cysts and polyps) | 1549（4.06%） | 570（5.41%） |
| Musculoskeletal and connective tissue disorders | 1138（2.98%） | 98（0.93%） |
| Metabolism and nutrition disorders | 1333（3.49%） | 219（2.08%） |
| Investigations | 2844（7.45%） | 585（5.55%） |
| Injury, poisoning and procedural complications | 2421（6.34%） | 1920（18.23%） |
| Infections and infestations | 1681（4.40%） | 391（3.71%） |
| Immune system disorders | 192（0.50%） | 3（0.03%） |
| Hepatobiliary disorders | 730（1.91%） | 139（1.32%） |
| General disorders and administration site conditions | 6228（16.31%） | 350（3.32%） |
| Gastrointestinal disorders | 6142（16.08%） | 1849（17.55%） |
| Eye disorders | 239（0.63%） | 29（0.28%） |
| Endocrine disorders | 252（0.66%） | 13（0.12%） |
| Ear and labyrinth disorders | 58（0.15%） | 3（0.03%） |
| Congenital, familial and genetic disorders | 22（0.06%） | 22（0.21%） |
| Cardiac disorders | 843（2.21%） | 164（1.56%） |
| Blood and lymphatic system disorders | 2933（7.68%） | 831（7.89%） |

**Supplementary Table S4.** Effective signals for general disorders and administration site conditions

| **Over-indications use** | | | | | | |
| --- | --- | --- | --- | --- | --- | --- |
| PT | a | ROR | PRR | Lower limit of 95% Cl (ROR) | Upper limit of 95% Cl (ROR) | Chi square |
| Catheter site erythema | 7 | 3.83 | 3.83 | 1.82 | 8.06 | 14.52 |
| Catheter site pain | 10 | 4.72 | 4.72 | 2.53 | 8.80 | 28.99 |
| Tenderness | 25 | 2.21 | 2.21 | 1.49 | 3.27 | 16.44 |
| Perforation | 23 | 25.32 | 25.29 | 16.64 | 38.54 | 508.60 |
| Therapy responder | 5 | 9.78 | 9.78 | 4.03 | 23.71 | 38.57 |
| Multi-organ failure | 16 | 2.72 | 2.72 | 1.66 | 4.45 | 17.31 |
| Multimorbidity | 4 | 3.81 | 3.80 | 1.42 | 10.18 | 8.20 |
| Non-cardiac chest pain | 8 | 2.74 | 2.74 | 1.37 | 5.48 | 8.76 |
| Necrosis | 20 | 3.98 | 3.98 | 2.56 | 6.18 | 44.19 |
| Disease progression | 1302 | 13.11 | 12.42 | 12.39 | 13.88 | 13368.96 |
| Tachyphylaxis | 8 | 21.66 | 21.66 | 10.66 | 44.03 | 150.51 |
| Pelvic mass | 3 | 4.47 | 4.47 | 1.43 | 13.94 | 8.01 |
| Organ failure | 18 | 6.49 | 6.48 | 4.07 | 10.33 | 82.34 |
| Device related thrombosis | 8 | 7.04 | 7.04 | 3.50 | 14.16 | 40.82 |
| General physical health deterioration | 230 | 2.07 | 2.06 | 1.81 | 2.35 | 124.76 |
| Effusion | 5 | 3.89 | 3.89 | 1.61 | 9.38 | 10.65 |
| Infusion site haematoma | 3 | 13.46 | 13.46 | 4.27 | 42.43 | 33.60 |
| Death | 3496 | 4.44 | 3.91 | 4.28 | 4.60 | 7817.70 |
| Performance status decreased | 19 | 4.84 | 4.83 | 3.08 | 7.60 | 57.19 |
| Extravasation | 14 | 3.82 | 3.82 | 2.26 | 6.46 | 28.87 |
| Ill-defined disorder | 148 | 2.68 | 2.67 | 2.28 | 3.16 | 154.41 |
| No adverse event | 1238 | 8.63 | 8.21 | 8.15 | 9.14 | 7756.84 |
| Fibrosis | 6 | 2.28 | 2.28 | 1.02 | 5.08 | 4.27 |
| Drug effective for unapproved indication | 160 | 5.45 | 5.41 | 4.66 | 6.37 | 569.80 |
| Axillary pain | 5 | 3.18 | 3.18 | 1.32 | 7.67 | 7.43 |
| Induration | 6 | 3.38 | 3.38 | 1.51 | 7.55 | 9.99 |
| Impaired healing | 133 | 4.11 | 4.09 | 3.46 | 4.87 | 307.82 |
| Early satiety | 4 | 3.62 | 3.62 | 1.35 | 9.70 | 7.54 |
| Mucosal dryness | 5 | 2.42 | 2.42 | 1.00 | 5.82 | 4.13 |
| Mucosal disorder | 4 | 3.31 | 3.31 | 1.24 | 8.85 | 6.40 |
| Mucosal inflammation | 146 | 6.31 | 6.28 | 5.36 | 7.43 | 639.55 |
| Fat necrosis | 3 | 5.63 | 5.63 | 1.80 | 17.57 | 11.27 |
| Implant site dehiscence | 5 | 84.74 | 84.72 | 32.63 | 220.07 | 349.04 |
| Therapy partial responder | 71 | 6.08 | 6.06 | 4.81 | 7.68 | 296.23 |
| No therapeutic response | 21 | 2.23 | 2.23 | 1.45 | 3.42 | 14.13 |
| **Approved indications use** | | | | | | |
| PT | a | ROR | PRR | Lower limit of 95% Cl (ROR) | Upper limit of 95% Cl (ROR) | Chi square |
| Administration site bruise | 3 | 20.62 | 20.62 | 3.45 | 123.43 | 22.40 |
| Administration site haemorrhage | 3 | 41.25 | 41.23 | 4.29 | 396.56 | 29.44 |
| Breakthrough pain | 4 | 6.11 | 6.11 | 1.88 | 19.85 | 11.83 |
| Catheter site haemorrhage | 3 | 5.89 | 5.89 | 1.52 | 22.79 | 8.53 |
| Catheter site injury | 4 | 13.75 | 13.74 | 3.44 | 54.98 | 23.64 |
| Device related thrombosis | 6 | 3.06 | 3.05 | 1.26 | 7.40 | 6.78 |
| Drug effective for unapproved indication | 44 | 12.64 | 12.60 | 8.39 | 19.04 | 245.28 |
| Drug ineffective for unapproved indication | 17 | 2.05 | 2.05 | 1.23 | 3.42 | 7.96 |
| Extravasation | 9 | 2.95 | 2.95 | 1.43 | 6.06 | 9.53 |
| Hypothermia | 7 | 2.67 | 2.67 | 1.19 | 6.01 | 6.14 |
| Impaired healing | 67 | 3.11 | 3.10 | 2.39 | 4.06 | 77.97 |
| Injection site extravasation | 8 | 7.86 | 7.85 | 3.30 | 18.74 | 30.46 |
| Injection site haematoma | 4 | 27.50 | 27.49 | 5.04 | 150.15 | 34.04 |
| Necrosis | 12 | 2.46 | 2.46 | 1.33 | 4.55 | 8.84 |
| Obstruction | 10 | 4.17 | 4.17 | 2.05 | 8.46 | 18.46 |
| Perforation | 38 | 27.58 | 27.49 | 15.89 | 47.85 | 323.44 |
| Temperature regulation disorder | 3 | 4.58 | 4.58 | 1.24 | 16.93 | 6.30 |
| Therapy partial responder | 108 | 2.42 | 2.40 | 1.97 | 2.97 | 75.55 |

**Supplementary Table S5.** Effective signals for skin and subcutaneous tissue disorders

| **Over-indications use** | | | | | | |
| --- | --- | --- | --- | --- | --- | --- |
| PT | a | ROR | PRR | Lower limit of 95% Cl (ROR) | Upper limit of 95% Cl (ROR) | Chi square |
| Dermatitis acneiform | 31 | 6.56 | 6.55 | 4.60 | 9.36 | 143.87 |
| Telangiectasia | 5 | 5.57 | 5.57 | 2.30 | 13.45 | 18.50 |
| Cutis laxa | 6 | 24.74 | 24.73 | 10.88 | 56.25 | 129.62 |
| Skin toxicity | 18 | 4.31 | 4.31 | 2.71 | 6.86 | 45.29 |
| Skin necrosis | 15 | 2.96 | 2.96 | 1.78 | 4.92 | 19.34 |
| Skin ulcer | 84 | 3.03 | 3.02 | 2.44 | 3.75 | 112.84 |
| Skin oedema | 3 | 3.26 | 3.26 | 1.05 | 10.15 | 4.67 |
| Palmar erythema | 4 | 3.60 | 3.60 | 1.35 | 9.64 | 7.46 |
| Onychomadesis | 8 | 2.25 | 2.25 | 1.12 | 4.51 | 5.53 |
| Palmar-plantar erythrodysaesthesia syndrome | 166 | 10.32 | 10.25 | 8.85 | 12.04 | 1356.85 |
| Nail discolouration | 17 | 3.94 | 3.93 | 2.44 | 6.35 | 36.89 |
| Onycholysis | 6 | 3.48 | 3.48 | 1.56 | 7.78 | 10.54 |
| Nail toxicity | 6 | 18.18 | 18.18 | 8.04 | 41.12 | 93.68 |
| Nail disorder | 31 | 3.67 | 3.67 | 2.58 | 5.23 | 59.77 |
| **Approved indications use** | | | | | | |
| PT | a | ROR | PRR | Lower limit of 95% Cl (ROR) | Upper limit of 95% Cl (ROR) | Chi square |
| Diabetic foot | 4 | 5.50 | 5.50 | 1.72 | 17.54 | 10.51 |
| Fingerprint loss | 3 | 5.16 | 5.15 | 1.37 | 19.44 | 7.31 |
| Nail discomfort | 4 | 7.86 | 7.85 | 2.30 | 26.84 | 15.23 |
| Paraneoplastic dermatomyositis | 5 | 9.82 | 9.82 | 3.12 | 30.95 | 23.10 |
| Prurigo | 3 | 10.31 | 10.31 | 2.31 | 46.08 | 14.41 |
| Pustular psoriasis | 6 | 6.35 | 6.34 | 2.41 | 16.70 | 18.48 |

**Supplementary Table S6.** Effective signals for injury, poisoning and procedural complications

| **Over-indications use** | | | | | | |
| --- | --- | --- | --- | --- | --- | --- |
| PT | a | ROR | PRR | Lower limit of 95% Cl (ROR) | Upper limit of 95% Cl (ROR) | Chi square |
| Anastomotic fistula | 4 | 13.75 | 13.74 | 3.44 | 54.98 | 23.64 |
| Anastomotic leak | 16 | 7.34 | 7.33 | 4.00 | 13.47 | 57.06 |
| Brain herniation | 3 | 5.89 | 5.89 | 1.52 | 22.79 | 8.53 |
| Concussion | 3 | 5.89 | 5.89 | 1.52 | 22.79 | 8.53 |
| Drug administration error | 6 | 2.66 | 2.66 | 1.11 | 6.38 | 5.21 |
| Gastroenteritis radiation | 4 | 7.86 | 7.85 | 2.30 | 26.84 | 15.23 |
| Gastrointestinal anastomotic leak | 10 | 11.46 | 11.45 | 4.95 | 26.54 | 52.05 |
| Ilium fracture | 3 | 10.31 | 10.31 | 2.31 | 46.08 | 14.41 |
| Incarcerated incisional hernia | 3 | 20.62 | 20.62 | 3.45 | 123.43 | 22.40 |
| Incisional hernia | 14 | 5.84 | 5.83 | 3.12 | 10.91 | 39.36 |
| Intentional product use issue | 273 | 4.31 | 4.23 | 3.76 | 4.94 | 518.43 |
| Intercepted medication error | 7 | 24.07 | 24.05 | 7.04 | 82.23 | 56.25 |
| Intercepted product preparation error | 5 | 17.19 | 17.18 | 4.61 | 64.02 | 33.87 |
| Intercepted product prescribing error | 3 | 8.25 | 8.25 | 1.97 | 34.52 | 11.94 |
| Multiple injuries | 3 | 10.31 | 10.31 | 2.31 | 46.08 | 14.41 |
| Off label use | 1431 | 2.34 | 2.17 | 2.20 | 2.48 | 834.86 |
| Post procedural fistula | 3 | 10.31 | 10.31 | 2.31 | 46.08 | 14.41 |
| Postoperative ileus | 6 | 27.50 | 27.49 | 6.88 | 109.99 | 51.06 |
| Procedural haemorrhage | 5 | 3.82 | 3.82 | 1.42 | 10.29 | 8.14 |
| Product preparation error | 7 | 16.04 | 16.04 | 5.39 | 47.75 | 45.55 |
| Radiation necrosis | 10 | 5.50 | 5.50 | 2.64 | 11.46 | 26.29 |
| Stoma site discharge | 3 | 13.75 | 13.74 | 2.77 | 68.13 | 17.73 |
| Stoma site haemorrhage | 20 | 5.62 | 5.61 | 3.34 | 9.45 | 53.83 |
| Stomal hernia | 7 | 10.70 | 10.69 | 3.98 | 28.73 | 34.59 |
| Suture related complication | 4 | 11.00 | 11.00 | 2.95 | 40.97 | 20.19 |
| Thoracic vertebral fracture | 4 | 3.44 | 3.44 | 1.15 | 10.28 | 5.53 |
| Vascular access complication | 7 | 9.63 | 9.62 | 3.66 | 25.30 | 31.81 |
| Vascular pseudoaneurysm | 9 | 4.42 | 4.42 | 2.09 | 9.37 | 18.01 |
| Wound complication | 11 | 3.44 | 3.44 | 1.78 | 6.66 | 15.20 |
| Wound dehiscence | 36 | 8.13 | 8.11 | 5.39 | 12.29 | 141.24 |
| **Approved indications use** | | | | | | |
| PT | a | ROR | PRR | Lower limit of 95% Cl (ROR) | Upper limit of 95% Cl (ROR) | Chi square |
| Anastomotic complication | 9 | 42.47 | 42.45 | 21.45 | 84.08 | 333.33 |
| Anastomotic leak | 24 | 52.09 | 52.04 | 34.14 | 79.48 | 1078.73 |
| Circumstance or information capable of leading to medication error | 139 | 3.75 | 3.73 | 3.17 | 4.43 | 275.79 |
| Eye injury | 20 | 6.33 | 6.33 | 4.07 | 9.85 | 88.51 |
| Failure to anastomose | 5 | 65.37 | 65.36 | 25.61 | 166.88 | 277.26 |
| Femoral neck fracture | 15 | 2.60 | 2.60 | 1.56 | 4.32 | 14.67 |
| Foreign body in eye | 7 | 6.28 | 6.28 | 2.98 | 13.24 | 30.65 |
| Gastrointestinal anastomotic leak | 6 | 16.25 | 16.24 | 7.20 | 36.68 | 82.89 |
| Hyphaema | 13 | 22.71 | 22.70 | 13.01 | 39.65 | 256.94 |
| Inadequate aseptic technique in use of product | 10 | 35.48 | 35.47 | 18.64 | 67.53 | 310.85 |
| Incision site impaired healing | 4 | 9.68 | 9.68 | 3.60 | 26.07 | 30.50 |
| Incisional hernia | 4 | 2.68 | 2.68 | 1.00 | 7.15 | 4.17 |
| Injection related reaction | 10 | 5.59 | 5.59 | 3.00 | 10.43 | 37.20 |
| Intentional product use issue | 1107 | 9.53 | 9.11 | 8.96 | 10.13 | 7879.25 |
| Intercepted medication error | 111 | 14.26 | 14.20 | 11.80 | 17.24 | 1321.20 |
| Intercepted product administration error | 39 | 3.91 | 3.91 | 2.85 | 5.36 | 83.61 |
| Intercepted product dispensing error | 3 | 3.32 | 3.32 | 1.06 | 10.32 | 4.82 |
| Intercepted product preparation error | 40 | 2.64 | 2.63 | 1.93 | 3.60 | 40.29 |
| Intercepted product selection error | 7 | 8.13 | 8.13 | 3.85 | 17.17 | 43.00 |
| Intercepted product storage error | 75 | 21.59 | 21.53 | 17.12 | 27.23 | 1402.23 |
| Occupational exposure to product | 43 | 4.41 | 4.41 | 3.27 | 5.96 | 112.23 |
| Off label use | 5925 | 7.67 | 5.93 | 7.45 | 7.90 | 25076.28 |
| Paternal exposure during pregnancy | 3 | 3.70 | 3.70 | 1.19 | 11.53 | 5.86 |
| Pneumocephalus | 5 | 15.15 | 15.15 | 6.22 | 36.94 | 63.96 |
| Post procedural fistula | 4 | 10.96 | 10.96 | 4.07 | 29.55 | 35.35 |
| Posterior capsule rupture | 4 | 38.94 | 38.94 | 14.03 | 108.10 | 136.26 |
| Procedural complication | 15 | 2.77 | 2.77 | 1.67 | 4.60 | 16.83 |
| Product preparation error | 58 | 2.72 | 2.71 | 2.10 | 3.52 | 62.38 |
| Product storage error | 230 | 2.29 | 2.27 | 2.01 | 2.61 | 164.20 |
| Radiation injury | 5 | 5.97 | 5.97 | 2.47 | 14.44 | 20.43 |
| Radiation necrosis | 26 | 81.57 | 81.47 | 53.73 | 123.82 | 1754.28 |
| Radiation pneumonitis | 5 | 4.36 | 4.36 | 1.81 | 10.52 | 12.81 |
| Radiation skin injury | 7 | 6.87 | 6.87 | 3.26 | 14.50 | 34.61 |
| Radius fracture | 7 | 2.48 | 2.47 | 1.18 | 5.20 | 6.12 |
| Retinal injury | 3 | 3.12 | 3.12 | 1.00 | 9.71 | 4.29 |
| Skin abrasion | 13 | 2.01 | 2.01 | 1.16 | 3.46 | 6.52 |
| Stoma complication | 4 | 3.21 | 3.21 | 1.20 | 8.59 | 6.05 |
| Stoma site haemorrhage | 12 | 5.60 | 5.60 | 3.17 | 9.89 | 44.76 |
| Stomal hernia | 3 | 6.44 | 6.44 | 2.06 | 20.14 | 13.61 |
| Stomal varices | 3 | 80.75 | 80.74 | 23.66 | 275.56 | 200.81 |
| Suture related complication | 3 | 3.94 | 3.94 | 1.27 | 12.29 | 6.54 |
| Suture rupture | 9 | 12.26 | 12.25 | 6.32 | 23.77 | 90.60 |
| Toxic anterior segment syndrome | 28 | 29.76 | 29.72 | 20.30 | 43.62 | 729.79 |
| Vascular access complication | 10 | 10.95 | 10.95 | 5.85 | 20.50 | 88.26 |
| Wound dehiscence | 34 | 13.28 | 13.26 | 9.44 | 18.68 | 374.63 |

**Supplementary Table S7.** Effective signals for vascular disorders

| **Over-indications use** | | | | | | |
| --- | --- | --- | --- | --- | --- | --- |
| PT | a | ROR | PRR | Lower limit of 95% Cl (ROR) | Upper limit of 95% Cl (ROR) | Chi square |
| Aneurysm | 5 | 3.27 | 3.27 | 1.23 | 8.68 | 6.37 |
| Aneurysm ruptured | 5 | 8.59 | 8.59 | 2.81 | 26.27 | 20.64 |
| Angiopathy | 8 | 4.23 | 4.23 | 1.92 | 9.35 | 15.09 |
| Aortic aneurysm | 7 | 4.58 | 4.58 | 1.95 | 10.78 | 14.70 |
| Aortic dissection | 19 | 4.36 | 4.35 | 2.60 | 7.30 | 37.28 |
| Arterial thrombosis | 10 | 4.74 | 4.74 | 2.31 | 9.73 | 21.95 |
| Arterioenteric fistula | 3 | 5.16 | 5.15 | 1.37 | 19.44 | 7.31 |
| Artery dissection | 3 | 10.31 | 10.31 | 2.31 | 46.08 | 14.41 |
| Blood pressure inadequately controlled | 7 | 3.70 | 3.70 | 1.61 | 8.53 | 10.87 |
| Deep vein thrombosis | 106 | 2.22 | 2.21 | 1.81 | 2.73 | 60.60 |
| Embolism | 117 | 7.62 | 7.55 | 6.07 | 9.55 | 429.95 |
| Embolism arterial | 18 | 6.70 | 6.69 | 3.81 | 11.76 | 58.58 |
| Embolism venous | 35 | 8.93 | 8.91 | 5.84 | 13.67 | 149.17 |
| Haemodynamic instability | 5 | 4.58 | 4.58 | 1.67 | 12.61 | 10.50 |
| Haemorrhage | 189 | 3.27 | 3.23 | 2.79 | 3.83 | 237.12 |
| Hypertension | 863 | 2.66 | 2.53 | 2.46 | 2.86 | 698.56 |
| Hypertensive emergency | 4 | 6.11 | 6.11 | 1.88 | 19.85 | 11.83 |
| Ischaemia | 7 | 3.32 | 3.32 | 1.45 | 7.58 | 9.13 |
| Lymphocele | 17 | 13.00 | 12.98 | 6.70 | 25.23 | 96.70 |
| Malignant hypertension | 4 | 3.93 | 3.93 | 1.29 | 11.94 | 6.79 |
| Microangiopathy | 7 | 7.40 | 7.40 | 2.95 | 18.56 | 25.19 |
| Peripheral arterial occlusive disease | 7 | 3.57 | 3.56 | 1.55 | 8.19 | 10.25 |
| Peripheral artery occlusion | 4 | 3.06 | 3.05 | 1.03 | 9.03 | 4.52 |
| Phlebitis | 15 | 3.13 | 3.12 | 1.78 | 5.48 | 17.66 |
| Poor venous access | 6 | 5.50 | 5.50 | 2.13 | 14.18 | 15.77 |
| Shock haemorrhagic | 15 | 2.43 | 2.43 | 1.40 | 4.20 | 10.69 |
| Trousseau's syndrome | 6 | 5.50 | 5.50 | 2.13 | 14.18 | 15.77 |
| Varicose vein ruptured | 12 | 5.16 | 5.15 | 2.66 | 10.02 | 29.23 |
| Vasculitis necrotising | 3 | 8.25 | 8.25 | 1.97 | 34.52 | 11.94 |
| Vena cava thrombosis | 13 | 2.67 | 2.67 | 1.47 | 4.84 | 11.35 |
| Venous thrombosis | 28 | 3.38 | 3.38 | 2.24 | 5.12 | 37.62 |
| Venous thrombosis limb | 9 | 2.10 | 2.10 | 1.04 | 4.23 | 4.48 |
| **Approved indications use** | | | | | | |
| PT | a | ROR | PRR | Lower limit of 95% Cl (ROR) | Upper limit of 95% Cl (ROR) | Chi square |
| Aneurysm ruptured | 4 | 4.82 | 4.82 | 1.80 | 12.90 | 11.97 |
| Angiopathy | 17 | 3.48 | 3.48 | 2.16 | 5.62 | 29.87 |
| Aortic arteriosclerosis | 8 | 3.04 | 3.04 | 1.52 | 6.09 | 10.86 |
| Aortic calcification | 3 | 6.80 | 6.79 | 2.17 | 21.25 | 14.61 |
| Aortic dissection | 24 | 4.02 | 4.01 | 2.69 | 6.00 | 53.84 |
| Arterial stenosis | 4 | 4.63 | 4.63 | 1.73 | 12.41 | 11.28 |
| Arterial thrombosis | 8 | 4.53 | 4.52 | 2.26 | 9.08 | 21.75 |
| Artery dissection | 3 | 11.83 | 11.83 | 3.76 | 37.23 | 29.00 |
| Cryoglobulinaemia | 4 | 5.34 | 5.34 | 1.99 | 14.30 | 13.93 |
| Deep vein thrombosis | 137 | 2.46 | 2.45 | 2.08 | 2.91 | 116.93 |
| Embolism | 52 | 7.18 | 7.16 | 5.46 | 9.44 | 271.61 |
| Embolism arterial | 6 | 6.52 | 6.52 | 2.91 | 14.60 | 27.65 |
| Embolism venous | 25 | 7.44 | 7.43 | 5.01 | 11.05 | 136.96 |
| Extremity necrosis | 7 | 3.97 | 3.97 | 1.89 | 8.36 | 15.44 |
| Hypertension | 936 | 4.50 | 4.35 | 4.21 | 4.80 | 2416.64 |
| Hypertensive crisis | 28 | 2.17 | 2.17 | 1.50 | 3.15 | 17.61 |
| Iris neovascularisation | 7 | 58.25 | 58.23 | 26.52 | 127.91 | 349.27 |
| Ischaemia | 13 | 3.05 | 3.05 | 1.77 | 5.26 | 17.76 |
| Jugular vein thrombosis | 7 | 4.78 | 4.78 | 2.27 | 10.07 | 20.71 |
| Labile blood pressure | 5 | 5.16 | 5.16 | 2.14 | 12.47 | 16.60 |
| Lymphoedema | 31 | 3.97 | 3.96 | 2.79 | 5.65 | 68.13 |
| Malignant hypertension | 4 | 5.38 | 5.38 | 2.01 | 14.43 | 14.11 |
| Microangiopathy | 3 | 3.44 | 3.44 | 1.10 | 10.71 | 5.15 |
| Neovascularisation | 5 | 19.39 | 19.39 | 7.92 | 47.45 | 83.64 |
| Peripheral ischaemia | 9 | 2.32 | 2.32 | 1.20 | 4.46 | 6.70 |
| Phlebitis | 14 | 3.12 | 3.12 | 1.84 | 5.27 | 19.98 |
| Subclavian vein thrombosis | 4 | 4.38 | 4.38 | 1.64 | 11.72 | 10.33 |
| Superior vena cava syndrome | 4 | 7.15 | 7.15 | 2.66 | 19.20 | 20.83 |
| Thrombophlebitis migrans | 8 | 34.54 | 34.53 | 16.83 | 70.87 | 242.19 |
| Thrombophlebitis superficial | 6 | 2.44 | 2.44 | 1.09 | 5.45 | 5.08 |
| Trousseau's syndrome | 4 | 22.88 | 22.88 | 8.38 | 62.46 | 79.69 |
| Vascular rupture | 6 | 3.33 | 3.33 | 1.49 | 7.44 | 9.72 |
| Venous thrombosis | 19 | 5.29 | 5.28 | 3.36 | 8.31 | 65.25 |
| Venous thrombosis limb | 6 | 2.80 | 2.80 | 1.26 | 6.26 | 6.92 |
